# Supplementary material
Source: Springer Nature journal article supplement (https://www.springermedizin.de/resource/supplementary/13014_2014_1137_MOESM4_ESM.pdf/9634972)

(a) True unenhanced

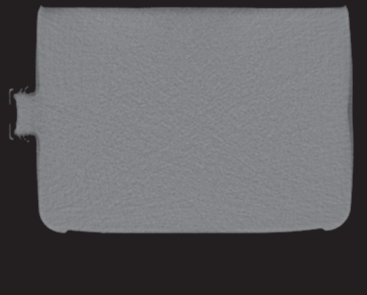

(b) Enhanced

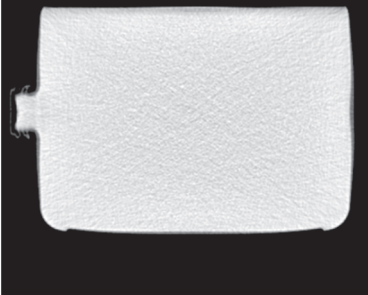

(c) Virtual unenhanced  
(80/Sn140-kVp)

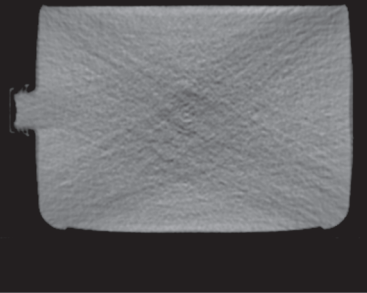

(d) Virtual unenhanced  
(100/Sn140-kVp)

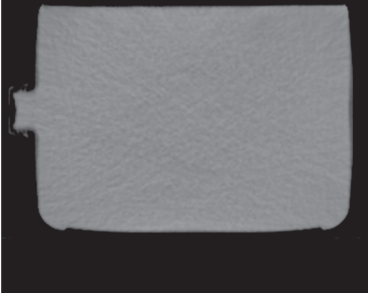

Supplement: MOESM4 [file 9634972]
